# Supplementary material for: Theoretical study of the influence of doped oxygen group elements on the properties of organic semiconductors
Source: Royal Society of Chemistry journal article supplement (doi:10.1039/d0na01026j), 2021-01-01
Supplement: d0na01026j1.pdf [file d0na01026j1.pdf]

## Theoretical study of the influence of doped oxygen group elements on the properties of organic semiconductors

Anmin Liu<sup>a,\*</sup>, Mengfan Gao<sup>a</sup>, Yan Ma<sup>a,c,\*</sup>, Xuefeng Ren<sup>b,\*</sup>, Liguo Gao<sup>a</sup>, Yanqiang  
Li<sup>a</sup>, Tingli Ma<sup>c,d</sup>

<sup>a</sup> State Key Laboratory of Fine Chemicals, School of Chemical Engineering, Dalian University of Technology, China.

E-mail: [liuanmin@dlut.edu.cn](mailto:liuanmin@dlut.edu.cn), [anmin0127@163.com](mailto:anmin0127@163.com)

<sup>b</sup> School of Ocean Science and Technology, Dalian University of Technology, Panjin, 124221, China.

E-mail: [renxuefeng@dlut.edu.cn](mailto:renxuefeng@dlut.edu.cn)

<sup>c</sup> Department of Materials Science and Engineering, China Jiliang University, Hangzhou, 310018, China.

<sup>d</sup> Graduate School of Life Science and Systems Engineering, Kyushu Institute of Technology, 2-4 Hibikino, Wakamatsu, Kitakyushu, Fukuoka 808-0196, Japan.

<sup>e</sup> School of Economics and Finance, Xi'an Jiaotong University.

E-mail: [18304280768@163.com](mailto:18304280768@163.com)

**Table S1.** Fukui (-), Fukui (+) indices for each atom of seven-membered benzothiophene

| Position    | Fukui(-)     | Fukui(+)     | Position     | Fukui(-)     | Fukui(+)     | Position     | Fukui(-)     | Fukui(+)     |
|-------------|--------------|--------------|--------------|--------------|--------------|--------------|--------------|--------------|
| C(1)        | -0.002       | 0.004        | C(10)        | 0.026        | 0.043        | C(19)        | 0.011        | 0.027        |
| C(2)        | 0.009        | 0.005        | C(11)        | 0.010        | 0.017        | C(20)        | 0.029        | 0.036        |
| C(3)        | 0.011        | 0.027        | C(12)        | -0.001       | -0.003       | C(21)        | 0.009        | 0.005        |
| C(4)        | 0.006        | -0.003       | C(13)        | 0.029        | 0.036        | C(22)        | -0.002       | 0.004        |
| <b>S(5)</b> | <b>0.103</b> | <b>0.065</b> | <b>S(14)</b> | <b>0.132</b> | <b>0.069</b> | <b>S(23)</b> | <b>0.103</b> | <b>0.065</b> |
| C(6)        | 0.017        | 0.016        | C(15)        | -0.001       | -0.003       | C(24)        | 0.017        | 0.016        |
| C(7)        | 0.016        | 0.030        | C(16)        | 0.010        | 0.017        | C(25)        | 0.016        | 0.030        |
| C(8)        | 0.019        | 0.009        | C(17)        | 0.026        | 0.043        | C(26)        | 0.019        | 0.009        |
| C(9)        | 0.011        | 0.024        | C(18)        | 0.006        | -0.003       | C(27)        | 0.011        | 0.024        |

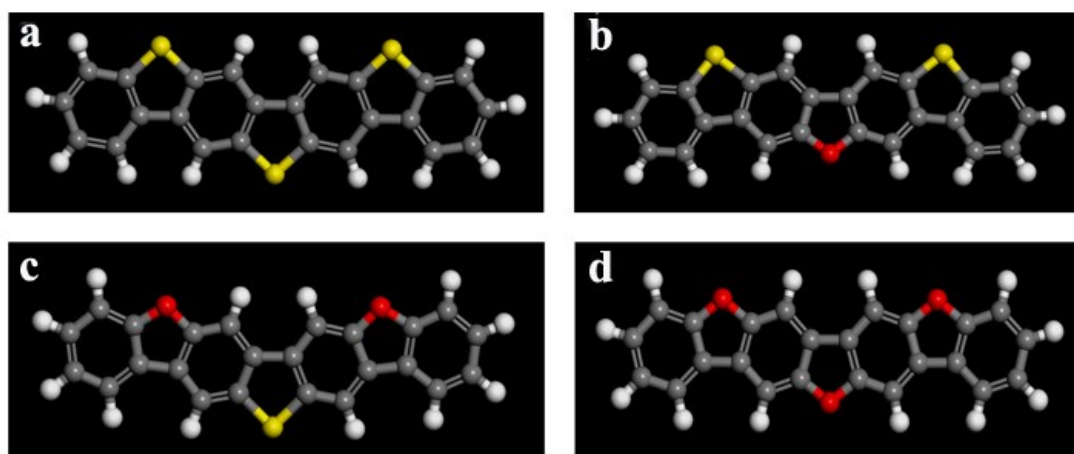**Fig. S1.** Schematic diagram of the structure of the doping site of the oxygen group element at the seven-membered benzothiophene (a: seven-membered benzothiophene; b: mono oxygen group elements doped benzothiophene; c: binary oxygen group elements doped benzothiophene; d: ternary oxygen group elements doped benzothiophene).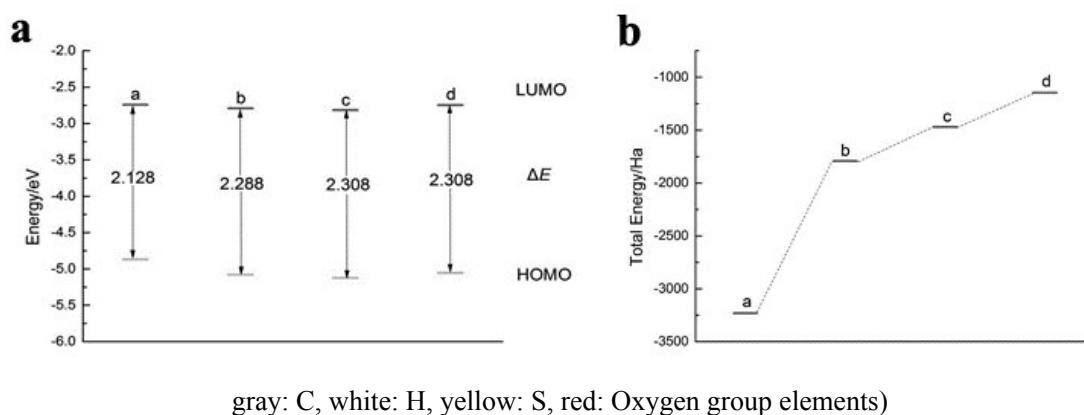**Fig. S2.** (a)  $E_{LUMO}$ ,  $E_{HOMO}$ , and  $\Delta E$  of seven-membered benzothiophene doped with O atom; (b) Schematic diagram of total energy of each substance (a: seven-membered benzothiophene;

b: mono O-doped seven-membered benzothiophene ; c: binary O-doped seven-membered benzothiophene; d: ternary O-doped seven-membered benzothiophene)

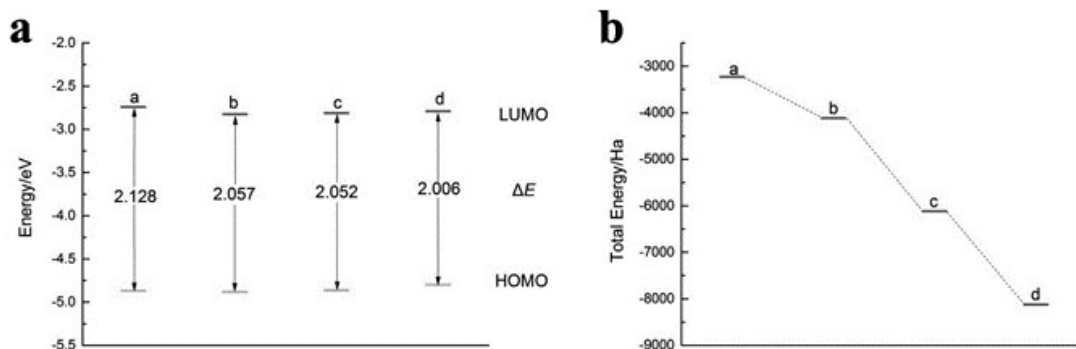

**Fig. S3.** (a)  $E_{LUMO}$ ,  $E_{HOMO}$ , and  $\Delta E$  of seven-membered benzothiophene doped with Se atom; (b) Schematic diagram of total energy of each substance (a: seven-membered benzothiophene; b: mono Se-doped seven-membered benzothiophene ; c: binary Se-doped seven-membered benzothiophene; d: ternary Se-doped seven-membered benzothiophene)

**Table S2.**  $E_{HOMO}$ ,  $E_{LUMO}$ ,  $\Delta E$  and total energy of undoped and Te-doped seven-membered benzothiophene

| Molecule                                              | $E_{HOMO}/\text{eV}$ | $E_{LUMO}/\text{eV}$ | $\Delta E/\text{eV}$ | Total energy/Ha   |
|-------------------------------------------------------|----------------------|----------------------|----------------------|-------------------|
| seven-membered benzothiophene                         | -4.869               | -2.741               | 2.128                | -3230.788         |
| mono Te-doped seven-membered benzothiophene           | -4.823               | -2.870               | 1.953                | -8330.948         |
| binary Te-doped seven-membered benzothiophene         | -4.790               | -2.846               | 1.944                | -14546.716        |
| <b>ternary Te-doped seven-membered benzothiophene</b> | <b>-4.658</b>        | <b>-2.810</b>        | <b>1.848</b>         | <b>-20762.485</b> |

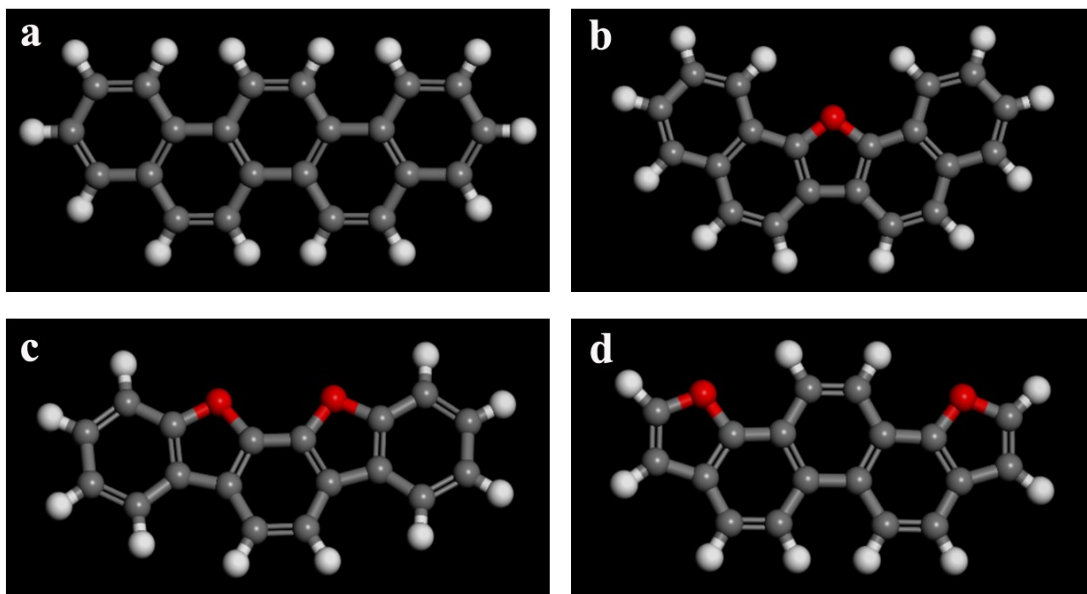

**Fig. S4.** Schematic diagram of the structure of the doping site of the oxygen group elements at the o-pentacene (a: o-pentacene; b: mono oxygen group elements doped o-pentacene; c: binary oxygen group elements doped o-pentacene (two-four ring); d: binary oxygen group elements doped o-pentacene(one-five ring).  
gray: C, white: H, red: Oxygen group elements)

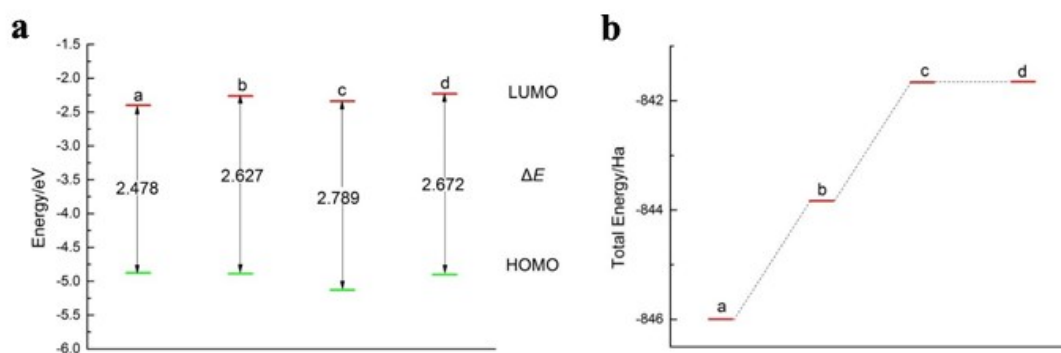

**Fig. S5.** (a)  $E_{LUMO}$ ,  $E_{HOMO}$ , and  $\Delta E$  of o-pentacene doped with O atoms;  
(b) Schematic diagram of total energy of each substance  
(a: o-pentacene; b: mono-O doped o-pentacene; c: binary O-doped o-pentacene (two-four ring); d: binary O-doped o-pentacene (one-five ring))

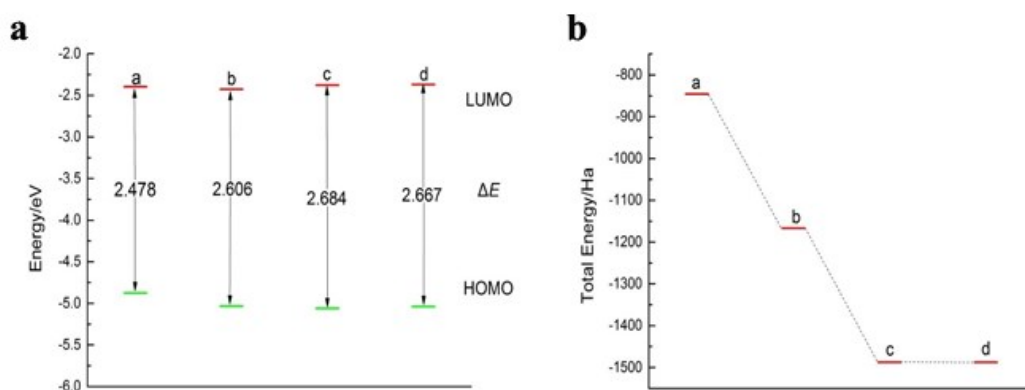

**Fig. S6.** (a)  $E_{LUMO}$ ,  $E_{HOMO}$ , and  $\Delta E$  of o-pentacene doped with S atoms;  
 (b) Schematic diagram of total energy of each substance  
 (a: o-pentacene; b: mono-S doped o-pentacene; c: binary S-doped o-pentacene  
 (two-four ring); d: binary S-doped o-pentacene (one-five ring))

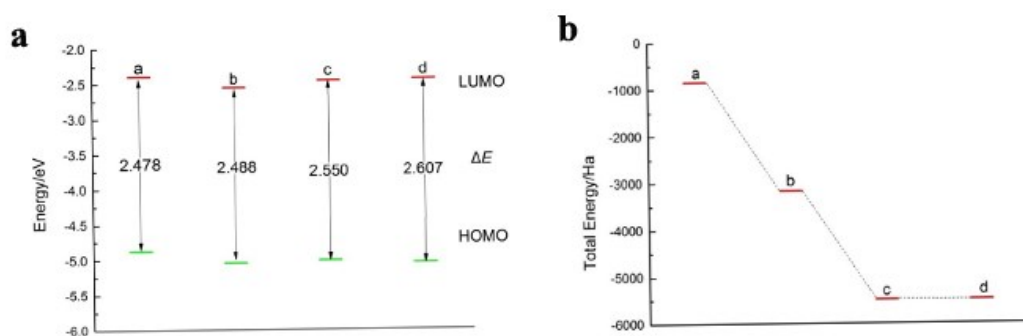

**Fig. S7.** (a)  $E_{LUMO}$ ,  $E_{HOMO}$ , and  $\Delta E$  of o-pentacene doped with Se atoms;  
 (b) Schematic diagram of total energy of each substance  
 (a: o-pentacene; b: mono-Se doped o-pentacene; c: binary Se-doped o-pentacene  
 (two-four ring); d: binary Se-doped o-pentacene (one-five ring))

**Table S3.**  $E_{HOMO}$ ,  $E_{LUMO}$ ,  $\Delta E$  and total energy of undoped and Te-doped o-pentacene

| Molecule                                                | $E_{HOMO}/\text{eV}$ | $E_{LUMO}/\text{eV}$ | $\Delta E/\text{eV}$ | Total energy/Ha   |
|---------------------------------------------------------|----------------------|----------------------|----------------------|-------------------|
| o-pentacene                                             | -4.877               | -2.399               | 2.478                | -845.997          |
| mono-Te doped o-pentacene                               | -4.977               | -2.678               | 2.299                | -7382.528         |
| <b>binary Te-doped o-pentacene<br/>(two-four ring);</b> | <b>-4.893</b>        | <b>-2.539</b>        | <b>2.354</b>         | <b>-13919.001</b> |
| binary Te-doped o-pentacene (one-<br>five ring)         | -5.004               | -2.510               | 2.494                | -13918.987        |

**Table S4.** Fukui (-), Fukui (+) indices for each atom of DP-DTT

| Position    | Fukui(-)     | Fukui(+)     | Position     | Fukui(-)     | Fukui(+)     | Position | Fukui(-) | Fukui(+) |
|-------------|--------------|--------------|--------------|--------------|--------------|----------|----------|----------|
| C(1)        | 0.021        | 0.011        | C(9)         | 0.022        | 0.026        | C(17)    | 0.011    | 0.010    |
| C(2)        | 0.021        | 0.014        | C(10)        | 0.039        | 0.029        | C(18)    | 0.019    | 0.020    |
| C(3)        | 0.021        | 0.014        | <b>S(11)</b> | <b>0.071</b> | <b>0.079</b> | C(19)    | 0.017    | 0.019    |
| C(4)        | 0.021        | 0.011        | C(12)        | -0.003       | 0.004        | C(20)    | 0.011    | 0.011    |
| <b>S(5)</b> | <b>0.087</b> | <b>0.087</b> | C(13)        | -0.003       | 0.004        | C(21)    | 0.032    | 0.035    |
| C(6)        | 0.022        | 0.026        | C(14)        | 0.017        | 0.019        | C(22)    | 0.011    | 0.010    |
| C(7)        | 0.039        | 0.029        | C(15)        | 0.011        | 0.011        | C(23)    | 0.019    | 0.020    |
| <b>S(8)</b> | <b>0.074</b> | <b>0.080</b> | C(16)        | 0.032        | 0.035        |          |          |          |

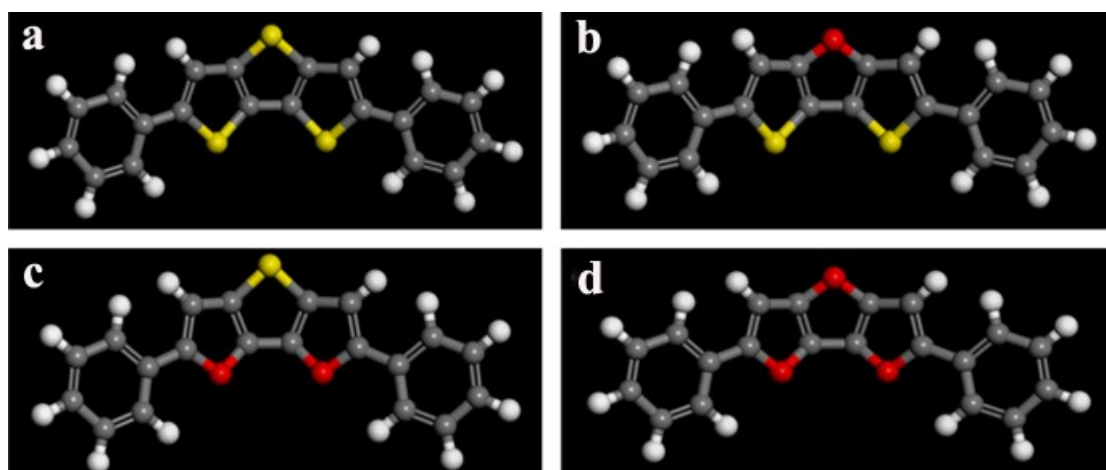

**Fig. S8.** Schematic diagram of the structure of the oxygen group element at the doping site of DP-DTT (a: DP-DTT; b: mono oxygen group elements doped DP-DTT; c: binary oxygen group elements doped DP-DTT; d: ternary oxygen group elements doped DP-DTT).

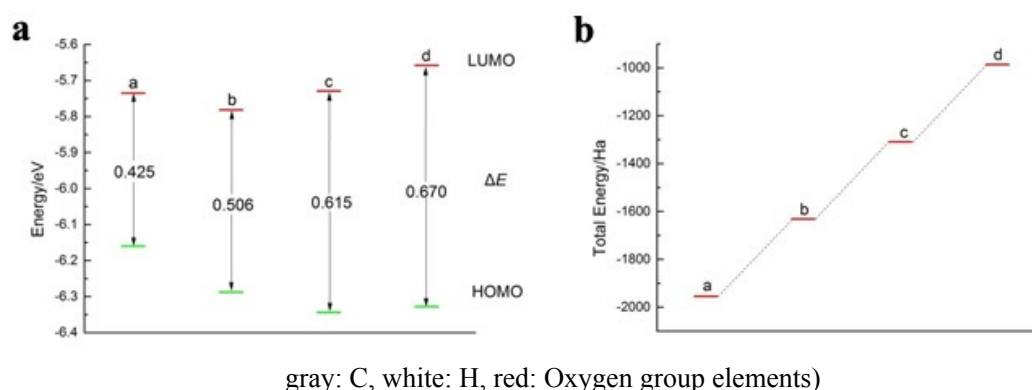

**Fig. S9.** (a)  $E_{LUMO}$ ,  $E_{HOMO}$ , and  $\Delta E$  of DP-DTT doped with O atom; (b) Schematic diagram of total energy of each substance (a: DP-DTT; b: mono O-doped DP-DTT; c: binary O-doped DP-DTT; d: ternary O-doped DP-DTT)

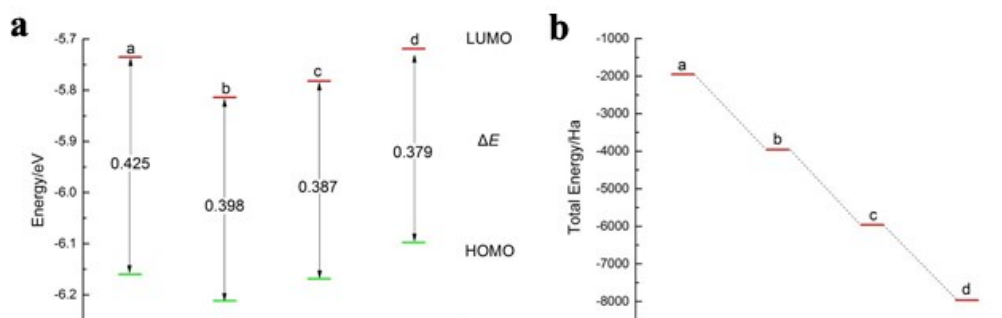

**Fig. S10.** (a)  $E_{LUMO}$ ,  $E_{HOMO}$ , and  $\Delta E$  of DP-DTT doped with Se atom; (b) Schematic diagram of total energy of each substance (a: DP-DTT; b: mono Se-doped DP-DTT; c: binary Se-doped DP-DTT; d: ternary Se-doped DP-DTT)

**Table S5.**  $E_{HOMO}$ ,  $E_{LUMO}$ ,  $\Delta E$  and total energy of undoped and Te-doped DP-DTT

| Molecule                | $E_{HOMO}/\text{eV}$ | $E_{LUMO}/\text{eV}$ | $\Delta E/\text{eV}$ | Total energy/Ha   |
|-------------------------|----------------------|----------------------|----------------------|-------------------|
| DP-DTT                  | -6.160               | -5.735               | 0.425                | -1954.536         |
| mono Te-doped DP-DTT    | -6.171               | -5.821               | 0.350                | -8170.734         |
| binary Te-doped DP-DTT  | <b>-6.075</b>        | <b>-5.762</b>        | <b>0.313</b>         | <b>-14386.396</b> |
| ternary Te-doped DP-DTT | -5.931               | -5.664               | 0.267                | -20602.174        |

**Table S6.** Fukui (-), Fukui (+) indices for each atom of pentacene

| Position    | Fukui(-)     | Fukui(+)     | Position     | Fukui(-)     | Fukui(+)     | Position     | Fukui(-)     | Fukui(+)     |
|-------------|--------------|--------------|--------------|--------------|--------------|--------------|--------------|--------------|
| C(1)        | 0.030        | 0.022        | <b>S(8)</b>  | <b>0.098</b> | <b>0.106</b> | C(15)        | 0.020        | 0.021        |
| C(2)        | 0.020        | 0.015        | C(9)         | 0.020        | 0.021        | C(16)        | 0.053        | 0.053        |
| C(3)        | 0.020        | 0.015        | C(10)        | 0.053        | 0.053        | <b>S(17)</b> | <b>0.096</b> | <b>0.105</b> |
| C(4)        | 0.030        | 0.022        | <b>S(11)</b> | <b>0.096</b> | <b>0.105</b> | H(18)        | 0.048        | 0.048        |
| <b>S(5)</b> | <b>0.095</b> | <b>0.104</b> | C(12)        | 0.009        | 0.007        | H(19)        | 0.055        | 0.054        |
| C(6)        | 0.009        | 0.007        | C(13)        | 0.023        | 0.018        | H(20)        | 0.048        | 0.048        |
| C(7)        | 0.023        | 0.018        | <b>S(14)</b> | <b>0.098</b> | <b>0.106</b> | H(21)        | 0.055        | 0.054        |

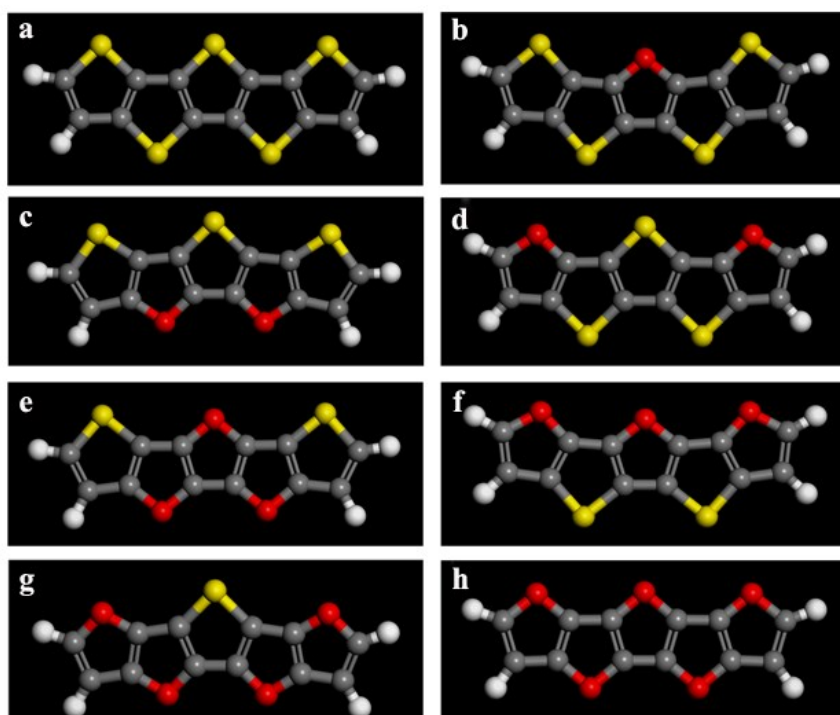

**Fig. S11.** Schematic diagram of the structure of the doping site of the oxygen group elements at the pentacene (a: pentacene; b: mono oxygen group elements doped pentacene; c: binary oxygen group elements doped pentacene (two-four ring); d: binary oxygen group elements doped pentacene (one-five ring); e: ternary oxygen group elements doped pentacene (two-three-four ring); f: ternary oxygen group elements doped pentacene (one-three-five-ring); g: quaternary oxygen group elements doped pentacene; h: five membered oxygen group-doped pentacene.

gray: C, white: H, red: Oxygen group element)

**Fig. 12.** (a)  $E_{LUMO}$ ,  $E_{HOMO}$ , and  $\Delta E$  of pentacene doped with O atom; (b) Schematic diagram of total energy of each substance (a: pentacene; b: mono O-doped pentacene; c: binary O-doped pentacene (two-four ring); d: binary O-doped pentacene (one-five ring); e: ternary O-doped pentacene (two-three-four ring); f: ternary O-doped pentacene (one-three-five-ring); g: quaternary O-doped pentacene; h: five membered O-doped pentacene)

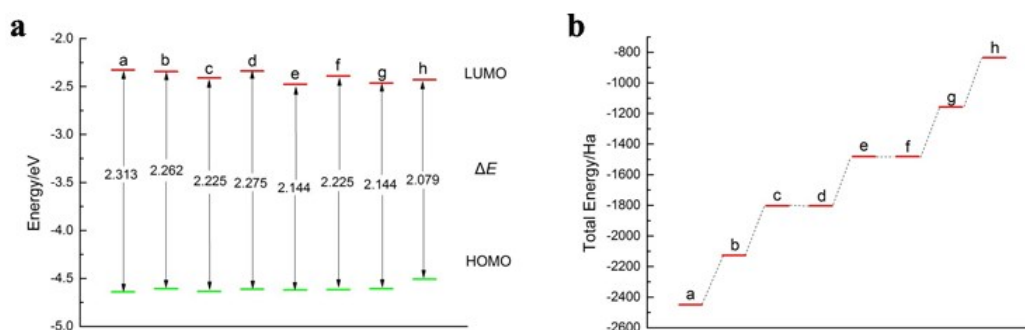



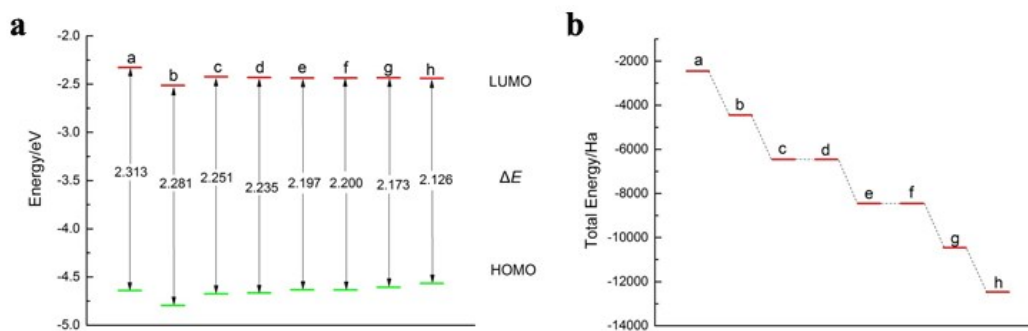

**Fig. S13.** (a)  $E_{LUMO}$ ,  $E_{HOMO}$ , and  $\Delta E$  of pentacene doped with Se atom; (b) Schematic diagram of total energy of each substance (a: pentacene; b: mono Se-doped pentacene; c: binary Se-doped pentacene (two-four ring); d: binary Se-doped pentacene (one-five ring); e: ternary Se-doped pentacene (two-three-four ring); f: ternary Se-doped pentacene (one-three-five-ring); g: quaternary Se-doped pentacene; h: five membered Se-doped pentacene)

**Table S7.**  $E_{HOMO}$ ,  $E_{LUMO}$ ,  $\Delta E$  and total energy of undoped and Te-doped pentacene

| Molecule                                            | $E_{HOMO}/\text{eV}$ | $E_{LUMO}/\text{eV}$ | $\Delta E/\text{eV}$ | Total energy/Ha   |
|-----------------------------------------------------|----------------------|----------------------|----------------------|-------------------|
| pentacene                                           | -4.640               | -2.327               | 2.313                | -2449.494         |
| mono Se-doped pentacene                             | -4.849               | -2.612               | 2.237                | -8665.292         |
| binary Se-doped pentacene<br>(two-four ring)        | -4.707               | -2.522               | 2.185                | -14881.068        |
| binary Se-doped pentacene<br>(one-five ring)        | -4.699               | -2.552               | 2.147                | -14881.058        |
| ternary Se-doped pentacene<br>(two-three-four ring) | -4.650               | -2.570               | 2.080                | -21096.843        |
| ternary Se-doped pentacene<br>(one-three-five-ring) | -4.649               | -2.568               | 2.081                | -21096.834        |
| quaternary Se-doped pentacene                       | -4.593               | -2.585               | 2.008                | -27312.609        |
| <b>five membered Se-doped pentacene</b>             | <b>-4.557</b>        | <b>-2.629</b>        | <b>1.928</b>         | <b>-33528.383</b> |
